# Supplementary material for: General synthesis of nanostructured phase-pure bimetallic carbides of molybdenum and tungsten
Source: Royal Society of Chemistry journal article supplement (doi:10.1039/d5nr03254g), 2025-01-01
Supplement: d5nr03254g1.pdf [file d5nr03254g1.pdf]

# **Electronic Supplementary Information**

## **General Synthesis of Nanostructured Phase-pure Bimetallic Carbides of Molybdenum and Tungsten**

*Yue Zhao <sup>a</sup>, Mingming Zhang <sup>a</sup>, Rong Liu, <sup>b\*</sup>*

<sup>a</sup> School of New Materials and Chemical Engineering, Tangshan University, Tangshan, 063000 China

<sup>b</sup> School of Chemical Engineering and Technology, TianJin University, Tianjin, 300072 China

\*Corresponding author: Rong Liu

*E-mail: liurong202311@163.com*

### **1. Experimental detail**

#### **Synthesis of Mo<sub>2</sub>C via Carbothermal Hydrogen Reduction**

Activated carbon (AC) was impregnated in a rotary evaporator at room temperature with an aqueous solution of ammonium heptamolybdate or an aqueous solution of ammonium heptamolybdate and nickel nitrate mixture. The molybdenum content was 20 wt. %. And Ni/Mo molar ratio was 0.1. After evaporating and drying in air at 80 °C overnight, the resulting mixture (0.5 g) was transferred to a quartz boat placed in a quartz tube reactor. After expelling air by argon at room temperature for 1 h, the temperature was increased linearly to the target temperature at 5 °C/min under a flow of H<sub>2</sub> (60 mL/min) and hold for 1 h. After cooled naturally to room temperature, the gas was switched off to allow the slow diffusion of air back into the tube to passivate the carbide surface to avoid bulk oxidation.

#### **Hydrothermal Synthesis of Bimetallic Oxides**

*CoMoO<sub>4</sub>*: All solvents and reagents were used as received. In a typical synthesis of bimetallic oxide using hydrothermal method, the process for

preparing nickel molybdenum oxide is selected as the representative. 0.005 mol of  $\text{Na}_2\text{MoO}_4 \cdot 2\text{H}_2\text{O}$  and 0.005 mol of  $\text{Co}(\text{NO}_3)_2 \cdot 6\text{H}_2\text{O}$  were respectively dissolved in 20 mL of deionized water and combined at room temperature with stirring. After stirring for 30 min, the mixture was transferred and sealed in a 60 mL Teflon-lined stainless steel autoclave and kept in an electric oven at 180 °C for 4 h. Then the autoclave was taken out of the oven and cool to room temperature naturally. The precipitate was harvested via centrifugation, washed thoroughly with water and ethanol, and dried at 80 °C overnight. Finally the product was ground to a fine powder for characterization.

*FeMoO<sub>4</sub>*: All solvents and reagents were used as received. In a typical synthesis of bimetallic oxide using hydrothermal method, the process for preparing nickel molybdenum oxide is selected as the representative. 0.005 mol of  $\text{Na}_2\text{MoO}_4 \cdot 2\text{H}_2\text{O}$  and 0.005 mol of  $\text{Fe}(\text{NO}_3)_2 \cdot 6\text{H}_2\text{O}$  were respectively dissolved in 20 mL of deionized water and combined at room temperature with stirring. After stirring for 30 min, the mixture was transferred and sealed in a 60 mL Teflon-lined stainless steel autoclave and kept in an electric oven at 180 °C for 4 h. Then the autoclave was taken out of the oven and cool to room temperature naturally. The precipitate was harvested via centrifugation, washed thoroughly with water and ethanol, and dried at 80 °C overnight. Finally the product was ground to a fine powder for characterization.

*CoWoO<sub>4</sub>*: All solvents and reagents were used as received. In a typical synthesis of bimetallic oxide using hydrothermal method, the process for preparing nickel molybdenum oxide is selected as the representative. 0.005 mol of  $\text{Na}_2\text{WO}_4 \cdot 2\text{H}_2\text{O}$  and 0.005 mol of  $\text{Co}(\text{NO}_3)_2 \cdot 6\text{H}_2\text{O}$  were respectively dissolved in 20 mL of deionized water and combined at room temperature with stirring. After stirring for 30 min, the mixture was transferred and sealed in a 60mL Teflon-lined stainless steel autoclave and kept in an electric oven at 180 °C for 4 h. Then the autoclave was taken out of the oven and cool to room temperature naturally. The precipitate was harvested via centrifugation, washed thoroughly

with water and ethanol, and dried at 80 °C overnight. Finally the product was ground to a fine powder for characterization.

*NiWO<sub>4</sub>*: All solvents and reagents were used as received. In a typical synthesis of bimetallic oxide using hydrothermal method, the process for preparing nickel molybdenum oxide is selected as the representative. 0.005 mol of Na<sub>2</sub>WO<sub>4</sub>·2H<sub>2</sub>O and 0.005 mol of Ni(NO<sub>3</sub>)<sub>2</sub>·6H<sub>2</sub>O were respectively dissolved in 20 mL of deionized water and combined at room temperature with stirring. After stirring for 30 min, the mixture was transferred and sealed in a 60 mL Teflon-lined stainless steel autoclave and kept in an electric oven at 180 °C for 4 h. Then the autoclave was taken out of the oven and cool to room temperature naturally. The precipitate was harvested via centrifugation, washed thoroughly with water and ethanol, and dried at 80 °C overnight. Finally the product was ground to a fine powder for characterization.

*FeWO<sub>4</sub>*: All solvents and reagents were used as received. In a typical synthesis of bimetallic oxide using hydrothermal method, the process for preparing nickel molybdenum oxide is selected as the representative. 0.005 mol of Na<sub>2</sub>WO<sub>4</sub>·2H<sub>2</sub>O and 0.005 mol of Fe(NO<sub>3</sub>)<sub>2</sub>·6H<sub>2</sub>O were respectively dissolved in 20 mL of deionized water and combined at room temperature with stirring. After stirring for 30 min, the mixture was transferred and sealed in a 60 mL Teflon-lined stainless steel autoclave and kept in an electric oven at 180 °C for 4 h. Then the autoclave was taken out of the oven and cool to room temperature naturally. The precipitate was harvested via centrifugation, washed thoroughly with water and ethanol, and dried at 80 °C overnight. Finally the product was ground to a fine powder for characterization.

## 2. Figures and Table

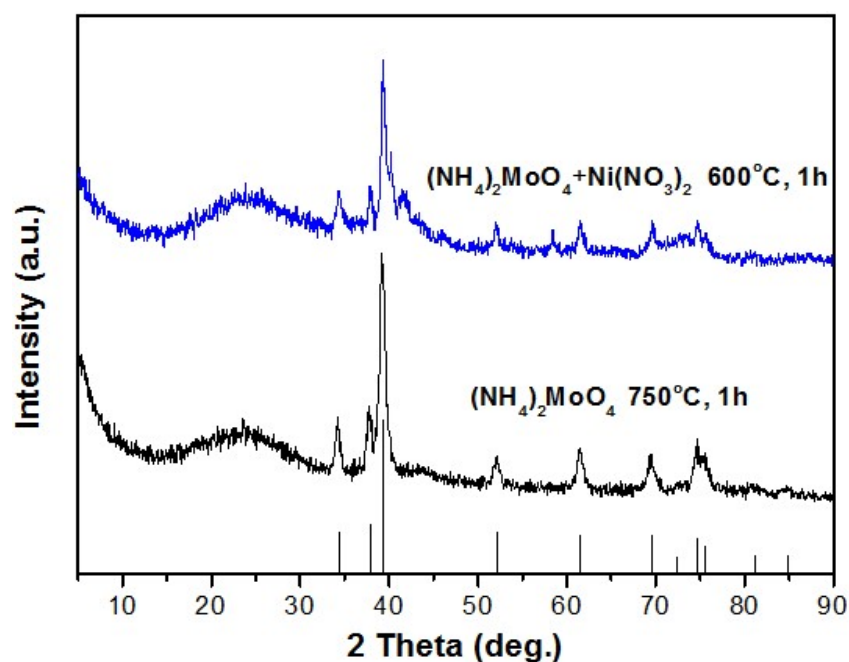

**Figure S1.** XRD patterns of the products obtained by carbothermal hydrogen reduction of  $(\text{NH}_4)_2\text{MoO}_4$  at  $750^\circ\text{C}$  and  $(\text{NH}_4)_2\text{MoO}_4 + \text{Ni}(\text{NO}_3)_2$  at  $600^\circ\text{C}$  for 1 h. The standard pattern of  $\text{Mo}_2\text{C}$  (PDF#35-0787) is shown (solid lines) at the bottom.

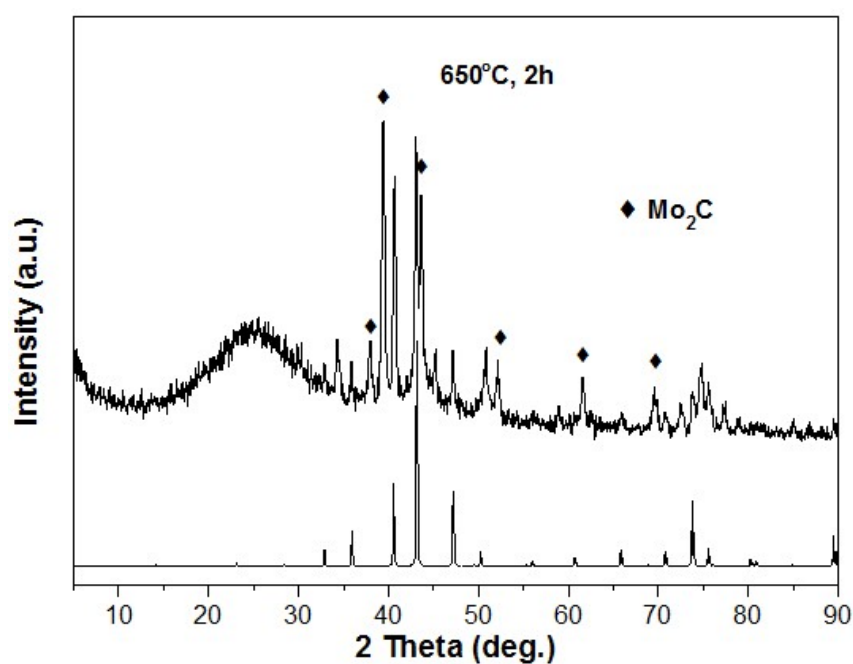

**Figure S2.** XRD patterns of the products obtained by carbothermal hydrogen reduction of  $\text{NiMoO}_4$  without hydrothermal treatment at  $650^\circ\text{C}$  for 2 h. The simulated pattern of  $\text{Ni}_6\text{Mo}_6\text{C}$  (PDF#80-0337) is shown (solid lines) at the bottom.

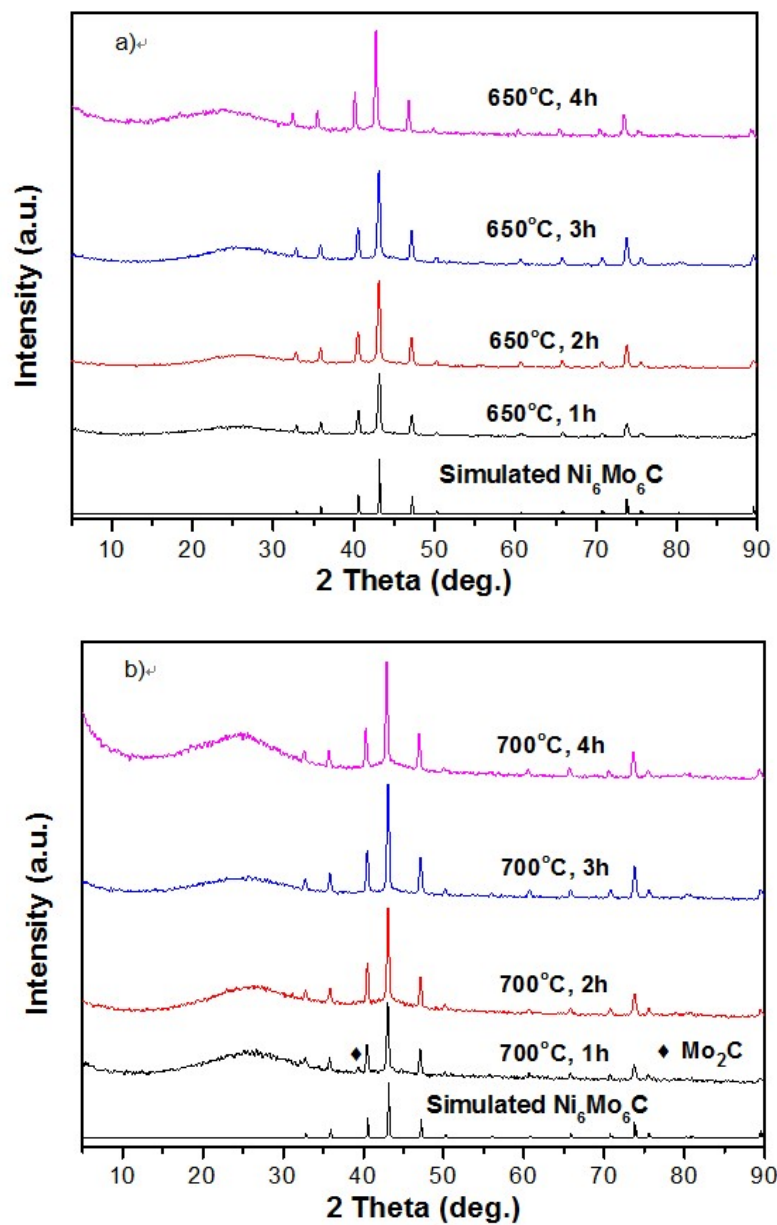

**Figure S3.** XRD patterns of the products obtained by carbothermal hydrogen reduction of  $\text{NiMoO}_4 \cdot n\text{H}_2\text{O}$  at 650 °C (a) and 700 °C (b) for 1-4 h.

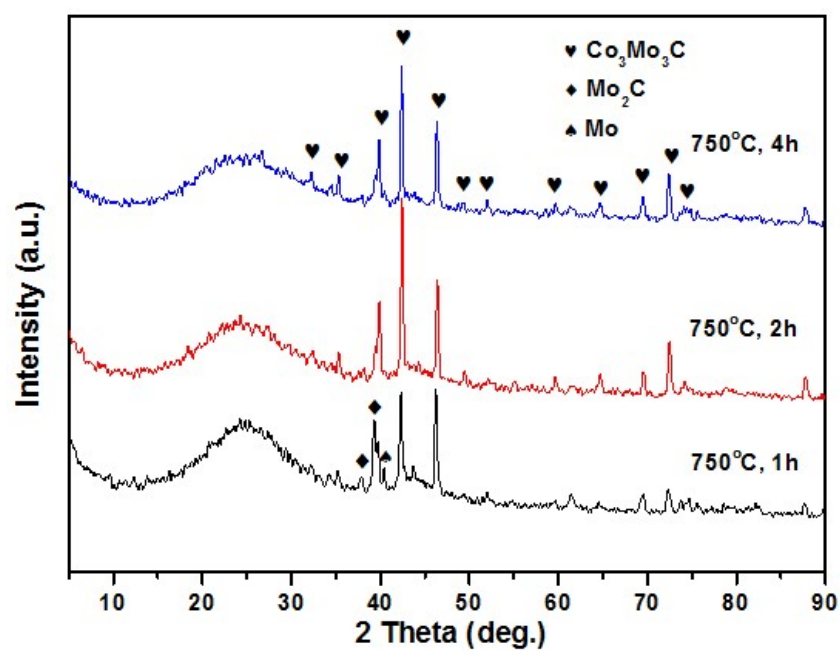

**Figure S4.** XRD patterns of the products obtained by carbothermal hydrogen reduction of  $\text{CoMoO}_4 \cdot n\text{H}_2\text{O}$  at 750 °C for 1-4 h.

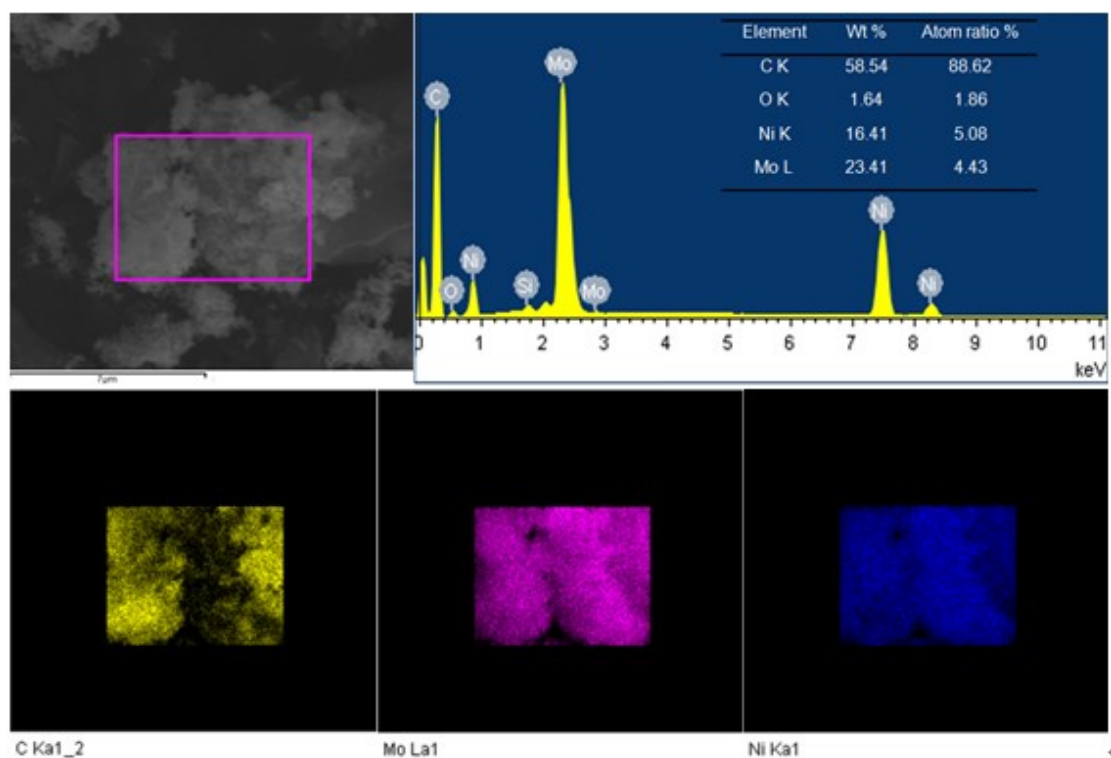

**Figure S5.** SEM energy dispersive spectroscopy and elemental mapping images of  $\text{Ni}_6\text{Mo}_6\text{C}$ .

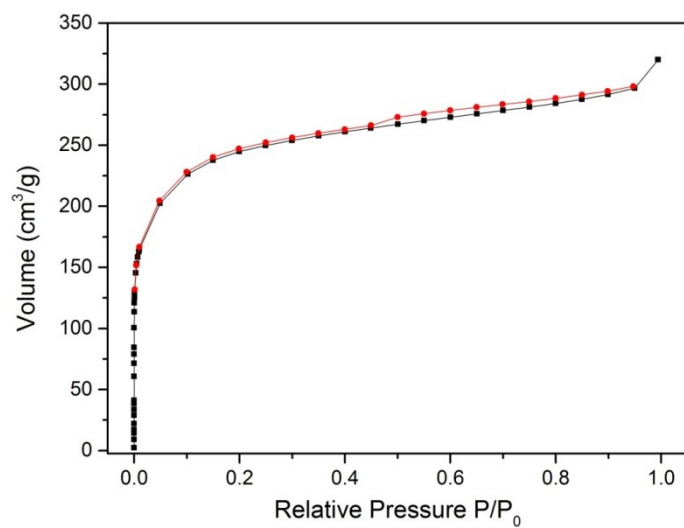

**Figure S6.**  $\text{N}_2$  sorption isotherms of  $\text{Ni}_6\text{Mo}_6\text{C}$  obtained at  $650^\circ\text{C}$  for 4 h.

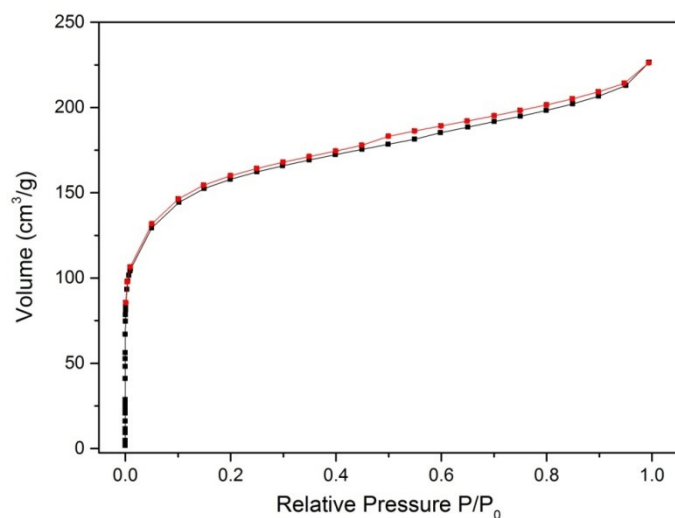

**Figure S7.** N<sub>2</sub> sorption isotherms of Fe<sub>3</sub>Mo<sub>3</sub>C obtained at 800 °C for 4 h.

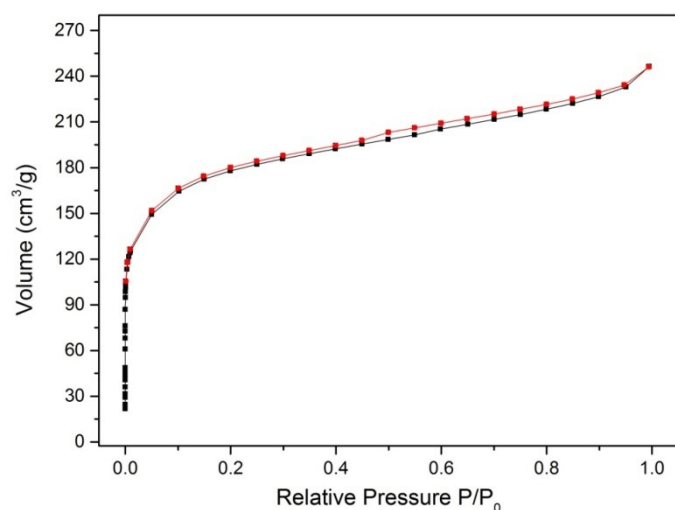

**Figure S8.** N<sub>2</sub> sorption isotherms of Co<sub>6</sub>W<sub>6</sub>C obtained at 800 °C for 4 h.

**Table S1.** Carbon contents, specific surface area, total pore volume, and average pore radius of the bimetallic carbide samples

| Sample                                             | C<br>content <sup>a</sup><br>(wt%) | Total Pore<br>Volume <sup>b</sup><br>(cm <sup>3</sup> /g) | Average Pore<br>Radius <sup>b</sup><br>(nm) | S <sub>BET</sub> <sup>b</sup><br>(m <sup>2</sup> /g) |
|----------------------------------------------------|------------------------------------|-----------------------------------------------------------|---------------------------------------------|------------------------------------------------------|
| Ni <sub>6</sub> Mo <sub>6</sub> C (650 °C for 4 h) | 60                                 | 0.495                                                     | 1.1                                         | 868                                                  |
| Fe <sub>3</sub> Mo <sub>3</sub> C (800 °C for 4 h) | 39                                 | 0.350                                                     | 1.3                                         | 553                                                  |
| Co <sub>6</sub> W <sub>6</sub> C (800 °C for 4 h)  | 33                                 | 0.342                                                     | 1.3                                         | 523                                                  |



<sup>a</sup>Determined by CHN analysis. <sup>b</sup> Specific surface area, total pore volume and average pore radius were calculated by the Brunauer –Emmett –Teller method and BJH method.

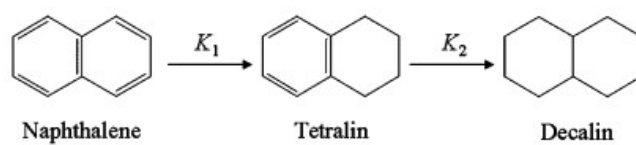

**Scheme S1.** Reaction pathways for the hydrogenation of naphthalene.
